# Supplementary material for: The probiotic Lactobacillus casei Zhang-mediated correction of gut dysbiosis ameliorates peritoneal fibrosis by suppressing macrophage-related inflammation via the butyrate/PPAR-γ/NF-κB pathway
Source: Royal Society of Chemistry journal article supplement (doi:10.1039/d3fo01518a), 2023-01-01
Supplement: d3fo01518a17.xlsx [file d3fo01518a17.xlsx]

## Sheet: Sheet1
Submesothelial thickness (μm)
NS	PD	PD+LCZ
14.8422	104.777	33.872
23.229	55.3494	29.1823
19.749	43.848	28.3185
11.2926	64.7653	37.816
20.01	111.186	35.003
18.096

## Sheet: Recorvered PDE volume
Recovered PDE volume (μL)
NS	PD	PD+LCZ
800	950	1750
1600	620	1000
1250	50	1250
1050	200	1450
1500	600	1050
1350

## Sheet: FCM
Sample	F4/80+ MΦ/WBC (%)	MHCII+ MΦ/MΦ (%)
NS_01	6.77	13.7
NS_02	7.67	29.6
NS_03	4.24	26.1
NS_04	3.57	22.3
NS_05	4.79	22.5
NS_06	5.51	28
PD_01	13.34	71.7
PD_02	5.16	43.6
PD_03	17.47	75.6
PD_04	10.89	33.9
PD_05	24.63	13.1
PD+LCZ_01	15.26	2.51
PD+LCZ_02	2.9	30
PD+LCZ_03	7.54	5.45
PD+LCZ_04	2.21	21.4
PD+LCZ_05	12.58	23.6

## Sheet: CBA
IL-6 (pg/mL)			TNF-α (pg/mL)			IL-10 (pg/mL)
NS	PD	PD+LCZ	NS	PD	PD+LCZ	NS	PD	PD+LCZ
235.32	380.73	62.48	42.68	53.07	32.72	10.83	9.18	16.15
730.86	10864.5	211.15	159.22	126.56	41.34	14.8	37.09	19.1
724.25	2836.92	235.07	113.13	172.58	44.41	124.05	20.99	29.71
176.63	469.97	202.48	68.71	133.5	28.85	16.2	26.65	3.09
305.8	580.95	83.38	53.09	44.87	58.72	15.62	9.92	5.42

## Sheet: α-diversity
ace index
NS	PD	PD+LCZ
210.823	275.809	302.342
210.015	239.505	272.807
244.433	253.352	289.313
288.137	272.464	273.097
251.282	229.155	270.409
230.621

## Sheet: GC-MS
Acetic acid (μg/mL)			Propionic acid (μg/mL)			Butyric acid (μg/mL)
NS	PD	PD+LCZ	NS	PD	PD+LCZ	NS	PD	PD+LCZ
9.16678	18.3063	12.0244	2.54301	4.68843	0.788445	2.97337	7.49959	2.15218
17.6783	37.5964	11.9059	6.84547	1.69688	1.64996	11.6432	3.41249	0.809013
15.5928	34.4786	108.178	1.86892	2.27186	1.59859	6.33064	8.16167	3.96405
10.2434	13.1713	42.6522	0.52994	3.96219	3.51709	1.20152	6.61637	2.4858
21.4465	63.5231	32.8396	6.49923	1.86333	1.84647	6.68763	5.55721	3.87914
16.104			4.05864			11.8732

## Sheet: CCK8
Absorbance (450nm)
CTL	ACE	PRO	BUT
2.126	0.679	0.654	0.616
1.802	0.789	0.552	0.538
2.13	0.779	0.427	0.551

## Sheet: PCR_mouse
Sample	CT(GAPDH)	CT(PPARG)	CT(FABP4)	CT(CD36)
CTL_01	28.7695	30.1962	28.799	30.5985
CTL_02	27.599	30.7121	29.3788	30.3936
CTL_03	28.0545	29.9963	28.75	30.731
CTL_04	26.3746	29.7161	28.8959	31.2193
CTL_05	27.5311	29.916	28.7847	30.6759
CTL_06	30.1951	30.3069	29.2687	30.8601
PD_01	26.5212	30.2701	29.4975	30.7883
PD_02	27.4294	30.3791	28.9873	31.1045
PD_03	25.3593	30.0245	29.5599	32.5198
PD_04	25.6573	30.4062	29.4284	31.4948
PD_05	26.0813	30.7739	29.2105	31.1196
PD+LCZ_01	28.5154	30.8229	29.3955	31.8684
PD+LCZ_02	27.1834	30.1874	28.9198	30.8798
PD+LCZ_03	26.607	30.2015	29.34	31.483
PD+LCZ_04	27.0614	30.616	28.922	30.6118
PD+LCZ_05	26.1944	30.7006	29.2848	31.3836

## Sheet: PCR_cell1
Sample	CT(GAPDH)	CT(PPARG)
CTL+NG_01	13.4307	27.1283
CTL+NG_02	12.8739	26.3847
CTL+NG_03	12.5482	26.6352
CTL+NG_04	13.3647	27.5135
ACE+NG_01	14.811	28.0517
ACE+NG_02	14.2497	28.0984
ACE+NG_03	14.1678	27.5635
ACE+NG_04	14.1954	27.4495
PRO+NG_01	14.2484	27.7252
PRO+NG_02	14.0932	27.7628
PRO+NG_03	14.1762	28.2437
PRO+NG_04	14.2195	27.7757
BUT+NG_01	15.4535	27.279
BUT+NG_02	15.5185	27.0068
BUT+NG_03	15.3601	26.6919
BUT+NG_04	15.3363	26.5148
CTL+HG_01	13.1324	29.8365
CTL+HG_02	13.1135	28.9865
CTL+HG_03	13.1658	29.8409
CTL+HG_04	13.0368	30.3649
ACE+HG_01	14.1777	28.9355
ACE+HG_02	14.278	30.3363
ACE+HG_03	14.2595	28.9869
ACE+HG_04	14.203	28.1117
PRO+HG_01	14.0432	27.7278
PRO+HG_02	14.0127	27.9142
PRO+HG_03	14.1489	28.0859
PRO+HG_04	14.076	28.5197
BUT+HG_01	15.2808	26.9438
BUT+HG_02	15.4955	27.389
BUT+HG_03	15.6796	27.2284
BUT+HG_04	15.6173	27.1249

## Sheet: PCR_cell2
Sample	CT(GAPDH)	CT(iNOS)	CT(IL-6)
CTL_01	12.8983	26.3726	24.8688
CTL_02	12.9803	26.1193	25.4564
CTL_03	13.6469	26.6265	26.3553
CTL_04	13.743	27.5076	25.1472
HG_01	15.1885	26.7191	27.1731
HG_02	14.7609	26.38	26.253
HG_03	14.668	26.8525	25.9521
HG_04	13.5597	26.5791	26.4058
HG+BUT_01	13.2415	30.6603	27.1541
HG+BUT_02	13.0936	28.9178	28.2216
HG+BUT_03	12.5588	29.6035	27.822
HG+BUT_04	13.225	28.7808	27.4135
HG+BUT+I_01	15.7476	28.2344	27.0713
HG+BUT+I_02	14.7084	27.3315	27.2344
HG+BUT+I_03	14.3744	27.5271	26.3467
