# Supplementary figures and images for: The probiotic Lactobacillus casei Zhang-mediated correction of gut dysbiosis ameliorates peritoneal fibrosis by suppressing macrophage-related inflammation via the butyrate/PPAR-γ/NF-κB pathway
Source: Royal Society of Chemistry journal article supplement (doi:10.1039/d3fo01518a), 2023-01-01

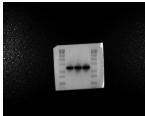

Supplement: d3fo01518a1.pdf [file d3fo01518a1.pdf]

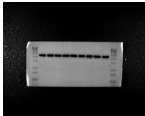

Supplement: d3fo01518a10.pdf [file d3fo01518a10.pdf]

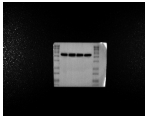

Supplement: d3fo01518a11.pdf [file d3fo01518a11.pdf]

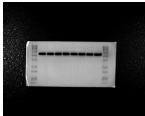

Supplement: d3fo01518a12.pdf [file d3fo01518a12.pdf]

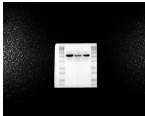

Supplement: d3fo01518a13.pdf [file d3fo01518a13.pdf]

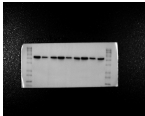

Supplement: d3fo01518a14.pdf [file d3fo01518a14.pdf]

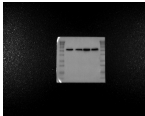

Supplement: d3fo01518a15.pdf [file d3fo01518a15.pdf]

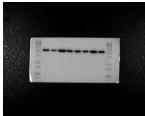

Supplement: d3fo01518a16.pdf [file d3fo01518a16.pdf]

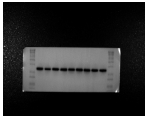

Supplement: d3fo01518a2.pdf [file d3fo01518a2.pdf]

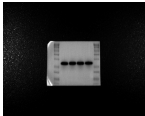

Supplement: d3fo01518a3.pdf [file d3fo01518a3.pdf]

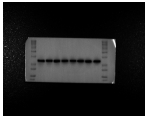

Supplement: d3fo01518a4.pdf [file d3fo01518a4.pdf]

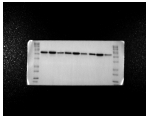

Supplement: d3fo01518a5.pdf [file d3fo01518a5.pdf]

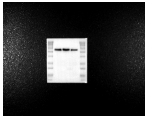

Supplement: d3fo01518a6.pdf [file d3fo01518a6.pdf]

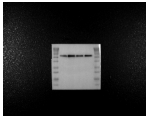

Supplement: d3fo01518a7.pdf [file d3fo01518a7.pdf]

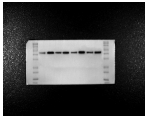

Supplement: d3fo01518a8.pdf [file d3fo01518a8.pdf]

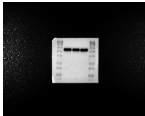

Supplement: d3fo01518a9.pdf [file d3fo01518a9.pdf]
